# Supplementary material for: Predicting Thermal Adaptation by Looking Into Populations’ Genomic Past
Source: Front Genet. 2020 Sep 25;11:564515. doi: 10.3389/fgene.2020.564515 (PMC7545011; doi:10.3389/fgene.2020.564515)
Supplement: TABLE S3 — Projections of CO2 concentration (ppm) to 2,050. Simulations follow the CIMP5 RCP 8.5 scenario from 1,860 to 2,050 available at KNMI (http://climexp.knmi.nl/) database averaged from an original 5 min resolution. [file Table_3.XLSX]

## Sheet: Hoja1
Time (Mya)	RCP8.5 CO2 (ppm)
1860	286.225
1861	286.375
1862	286.5
1863	286.625
1864	286.775
1865	286.9
1866	287
1867	287.1
1868	287.225
1869	287.375
1870	287.525
1871	287.7
1872	287.9
1873	288.125
1874	288.4
1875	288.7
1876	289.025
1877	289.4
1878	289.8
1879	290.225
1880	290.7
1881	291.2
1882	291.675
1883	292.125
1884	292.575
1885	292.975
1886	293.3
1887	293.575
1888	293.8
1889	294
1890	294.175
1891	294.325
1892	294.475
1893	294.6
1894	294.7
1895	294.8
1896	294.9
1897	295.025
1898	295.225
1899	295.5
1900	295.8
1901	296.125
1902	296.475
1903	296.825
1904	297.2
1905	297.625
1906	298.075
1907	298.5
1908	298.9
1909	299.3
1910	299.7
1911	300.075
1912	300.425
1913	300.775
1914	301.1
1915	301.4
1916	301.725
1917	302.075
1918	302.4
1919	302.7
1920	303.025
1921	303.4
1922	303.775
1923	304.125
1924	304.525
1925	304.975
1926	305.4
1927	305.825
1928	306.3
1929	306.775
1930	307.225
1931	307.7
1932	308.175
1933	308.6
1934	309
1935	309.4
1936	309.75
1937	310
1938	310.175
1939	310.3
1940	310.375
1941	310.375
1942	310.3
1943	310.2
1944	310.125
1945	310.1
1946	310.125
1947	310.2
1948	310.325
1949	310.5
1950	310.75
1951	311.1
1952	311.5
1953	311.925
1954	312.425
1955	313
1956	313.6
1957	314.225
1958	314.848
1959	315.5
1960	316.272
1961	317.075
1962	317.795
1963	318.397
1964	318.925
1965	319.647
1966	320.647
1967	321.605
1968	322.635
1969	323.902
1970	324.985
1971	325.855
1972	327.14
1973	328.678
1974	329.743
1975	330.585
1976	331.748
1977	333.272
1978	334.848
1979	336.525
1980	338.36
1981	339.728
1982	340.793
1983	342.197
1984	343.783
1985	345.283
1986	346.798
1987	348.645
1988	350.738
1989	352.488
1990	353.855
1991	355.017
1992	355.885
1993	356.777
1994	358.127
1995	359.837
1996	361.462
1997	363.155
1998	365.322
1999	367.348
2000	368.865
2001	370.467
2002	372.522
2003	374.76
2004	376.812
2005	378.812
2006	380.827
2007	382.777
2008	384.8
2009	387.012
2010	389.324
2011	391.638
2012	394.009
2013	396.464
2014	399.004
2015	401.628
2016	404.328
2017	407.096
2018	409.927
2019	412.822
2020	415.78
2021	418.796
2022	421.864
2023	424.995
2024	428.197
2025	431.475
2026	434.826
2027	438.245
2028	441.721
2029	445.251
2030	448.835
2031	452.474
2032	456.177
2033	459.964
2034	463.852
2035	467.85
2036	471.96
2037	476.182
2038	480.508
2039	484.927
2040	489.435
2041	494.032
2042	498.73
2043	503.53
2044	508.433
2045	513.456
2046	518.611
2047	523.9
2048	529.324
2049	534.875
2050	540.543
